# Supplementary material
Source: ML conference proceedings conference paper supplement (https://openreview.net/forum?id=52UtL8uA35)
Supplement: supplementary_material [file attachment]

## A APPENDIX

### A.1 DLGN ILLUSTRATIONS

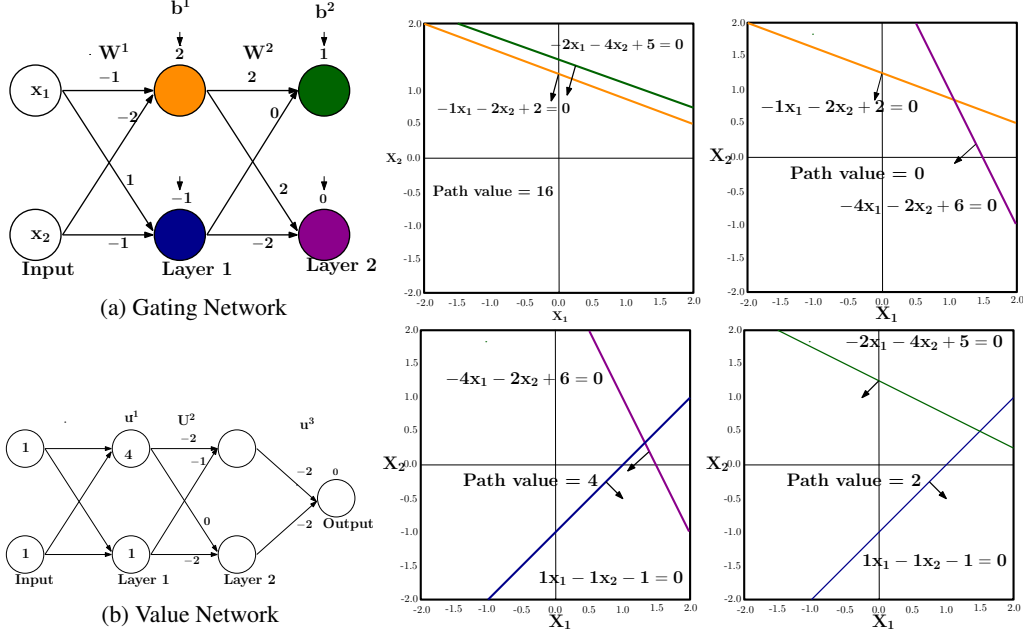

Figure 4: An illustration of DLGN network and node hyperplanes

Figure 4(a) and 4(b) give an example DLGN operating on a 2-dimensional input with 2 layers and 2 neurons per layer, i.e.  $d = m = L = 2$ . Figure 4(c) illustrates the region of activation for all the  $m^L = 4$  paths given by the gating network 4(a). The value network in Figure 4(b) gives the path value for all these paths by multiplying the appropriate weights in the path.

Next, we will discuss various variants of DLGN.

### A.2 DLGN-VT AND DLGN-SF

We also consider two natural variants of the DLGN architecture. The first is a simple re-parameterisation, where the gating network  $f_\pi$  is parameterised directly by the matrices  $V^1, V^2, \dots, V^L$ , each of shape  $m \times d$ , instead of using the parameters  $W^1, \dots, W^L$ . Clearly, this reparameterisation does not lose any representation power. We call this parameterisation as DLGN-SF (for shallow features).

Another variant that we use an explicit parameterisation of the coefficients  $g_\pi$  instead of using a value network. This parameterisation is also clearly more powerful than the standard DLGN parameterisation in the previous section. However, this requires a parameter tensor of size  $m^L$  and is not really practical for large  $L$  and  $m$ . We call this reparameterisation as DLGN-VT (for value tensor).

All of these models can be extended to allow a bias parameter for the gating network so that the functions  $\eta^\ell$  can also be affine functions instead of strict linear functions, but we do not discuss this version here for the purpose of simplicity.

Number of DLGN hyperplanes (after training) within a given distance of the label function ODT hyperplanes of DLGN-VT and DLGN-SF are shown in Table 5 and Table 4. At initialization, all these numbers are equal to zero. The 15 ODT internal nodes are numbered 0 to 14, with 0 as the root. Results of similar experiments as DLGN (Table 1) shown in Table 4 and 5 for DLGN\_SF and DLGN\_VT respectively depicts identical hyperplane-seeking properties of these two variants

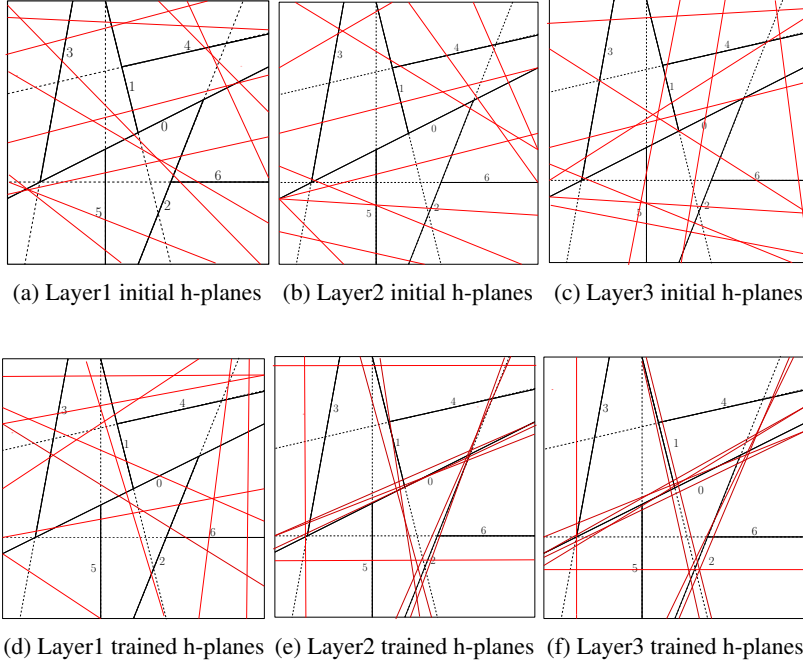

Figure 5: An illustration of DLGN hyperplanes before and after training on data in Fig 1c.

of DLGN models as well. For each node in the ODT, we count the number of DLGN hyperplanes within a distance of 0.1, 0.2, and 0.3 from it.

Table 4: Distance table for DLGN-SF Layers: 4 Nodes per layer: 10

| Distance             | 0    | 1    | 2    | 3    | 4    | 5    | 6    | 7    | 8    | 9    | 10   | 11   | 12   | 13   | 14   |
|----------------------|------|------|------|------|------|------|------|------|------|------|------|------|------|------|------|
| 0.1                  | 1    | 1    | 1    | 1    | 0    | 0    | 0    | 1    | 0    | 0    | 1    | 0    | 0    | 0    | 0    |
| 0.2                  | 1    | 1    | 1    | 1    | 1    | 1    | 1    | 1    | 1    | 0    | 1    | 1    | 1    | 1    | 0    |
| 0.3                  | 1    | 1    | 1    | 1    | 1    | 1    | 1    | 1    | 1    | 1    | 1    | 1    | 1    | 1    | 1    |
| Closest Dist.(init)  | 1.20 | 1.22 | 1.26 | 1.27 | 1.24 | 1.24 | 1.25 | 1.22 | 1.29 | 1.27 | 1.24 | 1.26 | 1.15 | 1.26 | 1.25 |
| Closest Dist.(final) | 0.05 | 0.07 | 0.08 | 0.08 | 0.12 | 0.11 | 0.13 | 0.09 | 0.18 | 0.26 | 0.08 | 0.16 | 0.10 | 0.14 | 0.21 |

Table 5: Distance table for DLGN-VT Layers: 4 Nodes per layer: 10

| Distance             | 0    | 1    | 2    | 3    | 4    | 5    | 6    | 7    | 8    | 9    | 10   | 11   | 12   | 13   | 14   |
|----------------------|------|------|------|------|------|------|------|------|------|------|------|------|------|------|------|
| 0.1                  | 3    | 2    | 2    | 0    | 2    | 2    | 1    | 1    | 0    | 1    | 2    | 1    | 1    | 1    | 1    |
| 0.2                  | 3    | 2    | 2    | 0    | 2    | 2    | 1    | 1    | 0    | 2    | 2    | 1    | 1    | 1    | 1    |
| 0.3                  | 3    | 2    | 2    | 0    | 2    | 2    | 1    | 1    | 1    | 2    | 2    | 1    | 1    | 1    | 1    |
| Closest Dist.(init)  | 1.16 | 1.27 | 1.23 | 1.22 | 1.28 | 1.22 | 1.18 | 1.17 | 1.27 | 1.26 | 1.19 | 1.21 | 1.26 | 1.23 | 1.21 |
| Closest Dist.(final) | 0.03 | 0.05 | 0.06 | 0.35 | 0.08 | 0.09 | 0.06 | 0.09 | 0.24 | 0.06 | 0.04 | 0.07 | 0.05 | 0.07 | 0.05 |

### A.3 DETAILS OF SUBROUTINES USED IN DLGN-DT

This function takes into account the DLGN model after training. It iteratively calculates the effective weights of the layer using the formula  $V^\ell = W^\ell W^{\ell-1} \dots W^1$  as in lines 3 of the algorithm. It finally returns each layer’s effective weight (hyperplanes) as a vector.

**Algorithm 3** Return gates of a trained DLGN model**Arguments:** A DLGN model with parameters  $W^1, \dots, W^L, \mathbf{u}^1, U^2, \dots, U^L, \mathbf{u}^{L+1}$ **Outputs:**  $mL$  hyperplanes in the input dimension

---

```

1: function GATEHYPERPLANES(model)
2:   for  $l \leftarrow 1$  to  $L$  do
3:      $V^l \leftarrow W^l W^{l-1} \dots W^1$ 
4:   end for
5:   return  $V \leftarrow V^1, \dots, V^L$ 
6: end function

```

---

## A.4 DATASETS USED

We have used 3 synthetic datasets and 20 tabular datasets to evaluate the performance of our model DLGN and its variants against some standard algorithms. In this section, we will elaborately describe the datasets used.

## A.4.1 SYNTHETIC DATASETS:

Table 6: Synthetic Datasets Generation

| dataset | total_samples | train_samples(n) | n_features(d) | depth | seed | thres | generate_data |
|---------|---------------|------------------|---------------|-------|------|-------|---------------|
| SDI     | 40000         | 20000            | 20            | 4     | 365  | 0     | through code  |
| SDII    | 60000         | 30000            | 100           | 4     | 365  | 0     | through code  |
| SDIII   | 100000        | 50000            | 500           | 4     | 365  | 0     | through code  |

This dataset is synthetically generated with specified dimensions from a labelling function  $f^*$  given by an Oblique Decision Tree (ODT) with depth and a defined number of data points as given in Table 6. The datapoints  $\mathbf{x}$  are drawn uniformly from the surface of a  $d$ -dimensional sphere of radius 1, centred at the origin. We used COB-ODTs as mentioned in Section 3 with biases kept at zero. The leaf node labels are chosen so that sibling labels get opposite signs. The final output includes the pruned data, labels, and information about the tree’s structure. Three synthetic datasets (SD) are used, named SDI, SDII, and SDIII.

Table 6 presents the parameters used for constructing the datasets.

## A.4.2 TABULAR DATASETS:

We used a total of 20 tabular binary classification datasets for the comparative study of our models. Most datasets are available in the UCI repository <https://archive.ics.uci.edu/datasets>. Some are taken from the OpenML benchmark, as given in the paper (Grinsztajn et al., 2022). [https://www.openml.org/search?type=benchmark&study\\_type=task&sort=tasks\\_included&id=298](https://www.openml.org/search?type=benchmark&study_type=task&sort=tasks_included&id=298). The dataset download URL is in Table 7. After downloading the datasets, they are preprocessed by dropping rows with missing values, converting categorical features using Label Encoding, Standardizing numerical features, and Encoding the target variables to 0 and 1.

Figure 5 illustrates an example scenario when a 3-hidden layer DLGN is trained on data given in Figure 1(c). The initial hyperplanes(h-planes) given by  $V^1$  and  $V^2$  and  $V^3$  as shown in Figure 5(a-c) are essentially random. However, after training, the hyperplanes in the later layers show a remarkable tendency to move towards the hyperplanes corresponding to the decision tree – particularly that of nodes close to the root (See Figures 5(d-f)).

## A.5 EXPERIMENTAL SETUP DETAILS

## A.5.1 TRAIN\_VALIDATION\_TEST SPLIT:

For the synthetic datasets SDI, SDII, and SDIII, the dataset is split into 50% train, 25% test, and 25% validation set. Models are trained on the training data and validated on the validation set, and

Table 7: Tabular datasets

| data   | download_link                                                                                                                                                                                     |
|--------|---------------------------------------------------------------------------------------------------------------------------------------------------------------------------------------------------|
| Adult  | <a href="https://archive.ics.uci.edu/static/public/2/adult.zip">https://archive.ics.uci.edu/static/public/2/adult.zip</a>                                                                         |
| Bank   | <a href="https://archive.ics.uci.edu/static/public/222/bank+marketing.zip">https://archive.ics.uci.edu/static/public/222/bank+marketing.zip</a>                                                   |
| Card   | <a href="https://archive.ics.uci.edu/static/public/350/default+of+credit+card+clients.zip">https://archive.ics.uci.edu/static/public/350/default+of+credit+card+clients.zip</a>                   |
| Telesc | <a href="https://archive.ics.uci.edu/static/public/159/magic+gamma+telescope.zip">https://archive.ics.uci.edu/static/public/159/magic+gamma+telescope.zip</a>                                     |
| Rice   | <a href="https://archive.ics.uci.edu/static/public/545/rice+cammeo+and+osmancik.zip">https://archive.ics.uci.edu/static/public/545/rice+cammeo+and+osmancik.zip</a>                               |
| Stat   | <a href="http://archive.ics.uci.edu/static/public/144/statlog+german+credit+data.zip">http://archive.ics.uci.edu/static/public/144/statlog+german+credit+data.zip</a>                             |
| Spam   | <a href="http://archive.ics.uci.edu/static/public/94/spambase.zip">http://archive.ics.uci.edu/static/public/94/spambase.zip</a>                                                                   |
| Gyro   | <a href="https://archive.ics.uci.edu/static/public/755/accelerometer+gyro+mobile+phone+dataset.zip">https://archive.ics.uci.edu/static/public/755/accelerometer+gyro+mobile+phone+dataset.zip</a> |
| Swar   | <a href="https://archive.ics.uci.edu/static/public/524/swarm+behaviour.zip">https://archive.ics.uci.edu/static/public/524/swarm+behaviour.zip</a>                                                 |
| Credit | <a href="https://api.openml.org/data/v1/download/22103185/credit.arff">https://api.openml.org/data/v1/download/22103185/credit.arff</a>                                                           |
| Elec   | <a href="https://api.openml.org/data/v1/download/22103245/electricity.arff">https://api.openml.org/data/v1/download/22103245/electricity.arff</a>                                                 |
| Cover  | <a href="https://api.openml.org/data/v1/download/22103246/covertime.arff">https://api.openml.org/data/v1/download/22103246/covertime.arff</a>                                                     |
| Pol    | <a href="https://api.openml.org/data/v1/download/22103247/pol.arff">https://api.openml.org/data/v1/download/22103247/pol.arff</a>                                                                 |
| House  | <a href="https://api.openml.org/data/v1/download/22103248/house_16H.arff">https://api.openml.org/data/v1/download/22103248/house_16H.arff</a>                                                     |
| Mini   | <a href="https://api.openml.org/data/v1/download/22103253/MiniBooNE.arff">https://api.openml.org/data/v1/download/22103253/MiniBooNE.arff</a>                                                     |
| Diab   | <a href="https://api.openml.org/data/v1/download/22111908/Diabetes130US.arff">https://api.openml.org/data/v1/download/22111908/Diabetes130US.arff</a>                                             |
| Jannis | <a href="https://api.openml.org/data/v1/download/22111907/jannis.arff">https://api.openml.org/data/v1/download/22111907/jannis.arff</a>                                                           |
| Bior   | <a href="https://api.openml.org/data/v1/download/22111905/Bioresponse.arff">https://api.openml.org/data/v1/download/22111905/Bioresponse.arff</a>                                                 |
| Calif  | <a href="https://api.openml.org/data/v1/download/22111914/california.arff">https://api.openml.org/data/v1/download/22111914/california.arff</a>                                                   |
| Heloc  | <a href="https://api.openml.org/data/v1/download/22111912/heloc.arff">https://api.openml.org/data/v1/download/22111912/heloc.arff</a>                                                             |

then the test score is reported against the test data with the best hyperparameters. Similarly, for the tabular datasets, the dataset is split into 60% train, 20% test, and 20% validation set.

#### A.5.2 NUMBER OF FOLDS:

Based on the algorithms used, the number of folds used is also varied. For standard ML algorithms like CART, Random Forest, SVM, and SVM Linear, we use 3-fold cross-validation; for most other algorithms, including DLGNs, we use one-fold size.

#### A.5.3 HARDWARE:

All the experiments are performed on Kaggle, and all the neural network-based experiments use GPU, whereas traditional ML algorithms are performed on CPU. Kaggle provided GPUs, such as GPU T4 x2 and GPU P100.

#### A.5.4 HYPERPARAMETERS TUNING:

Each algorithm used in this paper has a different set of hyperparameters, and hyperparameter tuning is one of the most important aspects for getting the best accuracy. Here, for each algorithm, we extensively searched from a collection of hyperparameters and validated their result on the validation set to obtain the best-performing hyperparameters. Test results are reported based on the best hyperparameters. The below tables give a list of all hyperparameters for each algorithm used.

Table 8: DLGN and DLGN-SF hyperparameters space

| Parameters            | Set of values searched on                   |
|-----------------------|---------------------------------------------|
| num layers            | 3, 4, 5                                     |
| num nodes(each layer) | 10, 20, 50, 100, 200, 500, 1000             |
| beta                  | 3, 10, 20, 30                               |
| learning rate(lr)     | 0.1, 0.01, 0.02, 0.05, 0.001, 0.005, 0.0001 |
| epochs                | 200, 300, 500                               |
| batches               | 1, 10, 100                                  |
| optimizers            | Adam, SGD                                   |
| weight decay          | 0, 0.1                                      |

Table 8 contains the hyperparameter set used in training the DLGN and DLGN-SF models on all the datasets. The trained model is tested on a validation set, and the best hyperparameter combination is found, which is then used to get the test accuracy. Parameters num layers, num nodes(each layer), and beta are the most important hyperparameters.

Table 9: DLGN-VT hyperparameters space

| Parameters            | Set of values searched on                       |
|-----------------------|-------------------------------------------------|
| num layers            | 3, 4                                            |
| num nodes(each layer) | 10, 20                                          |
| beta                  | 3, 10, 20, 30                                   |
| learning rate(lr)     | 1., 0.1, 0.01, 0.02, 0.05, 0.001, 0.005, 0.0001 |
| epochs                | 200, 300, 500, 1000, 5000, 10000, 15000         |
| batches               | 1, 10, 100                                      |
| optimizers            | Adam, SGD                                       |
| weight decay          | 0, 0.1                                          |
| C                     | 0.1, 0.03, 1.0                                  |
| max_iter              | 100, 500, 1000                                  |
| penalty               | l1, l2                                          |
| solver                | liblinear                                       |

Table 9 contains the hyperparameter set used in training the DLGN-VT model on all the datasets. The trained model is tested on a validation set, and the best hyperparameter combination is found, which is then used to get the test accuracy. Along with the DLGN parameters, it has C, max\_iter, penalty and solver as additional parameters.

Table 10 contains the hyperparameter set used in training the DLGN-DT models on all the datasets. The trained model is tested on a validation set, and the best hyperparameter combination is found, which is then used to get the test accuracy. It has eps, min\_samples and max\_depth as important parameters for finding the cluster centre and depth of the tree constructed.

Table 11 contains the hyperparameter set used in training the ReLU models on all the datasets. The trained model is tested on a validation set, and the best hyperparameter combination is found, which is then used to get the test accuracy.

Table 12 contains the hyperparameter set used in training the Linear SVM models on all the datasets. The trained model is tested on a validation set, and the best hyperparameter combination is found, which is then used to get the test accuracy. Here, kernel is set to Linear for Linear SVM.

Table 10: DLGN-DT hyperparameters space

| Parameters            | Set of values searched on                   |
|-----------------------|---------------------------------------------|
| num layers            | 3, 4, 5                                     |
| num nodes(each layer) | 10, 20, 50, 100, 200, 500, 1000             |
| beta                  | 3, 10, 20, 30                               |
| learning rate(lr)     | 0.1, 0.01, 0.02, 0.05, 0.001, 0.005, 0.0001 |
| epochs                | 200, 300, 500                               |
| batches               | 1, 10, 100                                  |
| optimizers            | Adam, SGD                                   |
| weight decay          | 0, 0.1                                      |
| eps                   | 0.1, 0.2, 0.3                               |
| min_samples           | 1, 2, 3, 5, 7, 10, 15, 22, 40               |
| max_depth             | 1 to 10                                     |

Table 11: ReLU hyperparameters space

| Parameters            | Set of values searched on                   |
|-----------------------|---------------------------------------------|
| num layers            | 3, 4, 5                                     |
| num nodes(each layer) | 10, 20, 50, 100, 200, 500, 1000             |
| learning rate(lr)     | 0.1, 0.01, 0.02, 0.05, 0.001, 0.005, 0.0001 |
| epochs                | 200, 500, 1000                              |
| optimizers            | Adam, SGD                                   |
| weight decay          | 0, 0.1                                      |

Table 13 contains the hyperparameter set used in training the Non-linear SVM models on all the datasets. The trained model is tested on a validation set, and the best hyperparameter combination is found, which is then used to get the test accuracy. Here, the kernel is set to Non-linear Kernels like rbf or sigmoid.

Table 14 contains the hyperparameter set used in training the CART model on all the datasets. The trained model is tested on a validation set, and the best hyperparameter combination is found, which is then used to get the test accuracy. max\_depth is the most important hyperparameter to train.

Table 15 contains the hyperparameter set used in training the random forest model on all the datasets. The trained model is tested on a validation set, and the best hyperparameter combination is found, which is then used to get the test accuracy. n\_estimators define the number of estimators in the random forest as one of the most vital hyperparameters.

Table 16 contains the hyperparameter set used in training the SDT model on all the datasets. The trained model is tested on a validation set, and the best hyperparameter combination is found, which is then used to get the test accuracy. depth is the tree depth of SDT which is the most vital hyperparameter to tune.

Table 17 contains the hyperparameter set used in training the TAO model on all the datasets. The trained model is tested on a validation set, and the best hyperparameter combination is found, which is then used to get the test accuracy. n\_iters, max\_leaf\_nodes and min\_node\_samples are important hyperparameters to train.

Table 18 contains the hyperparameter set used in training the Zan-DT models on all the datasets. The trained model is tested on a validation set, and the best hyperparameter combination is found, which is then used to get the test accuracy. depth, reg and mlp\_layer are vital parameters.

Table 19 contains the hyperparameter set used in training the Disnn model on all the datasets. The trained model is tested on a validation set, and the best hyperparameter combination is found, which is then used to get the test accuracy. A value of 10-15 for n\_polytopes\_list and m\_list works best.

Table 20 contains the hyperparameter set used in training the GLN model on all the datasets. The trained model is tested on a validation set, and the best hyperparameter combination is found, which

Table 12: SVM Linear hyperparameters space

| Parameters | Set of values searched on |
|------------|---------------------------|
| C          | 0.1, 0.5, 1, 2, 5         |
| kernel     | Linear                    |

Table 13: SVM hyperparameters space

| Parameters | Set of values searched on            |
|------------|--------------------------------------|
| C          | 0.1, 0.5, 1, 2, 5                    |
| kernel     | rbf, sigmoid                         |
| gamma      | scale, auto, 0.001, 0.01, 0.1, 1, 10 |
| degree     | 2, 3, 4, 5                           |

is then used to get the test accuracy. layer\_sizes, num\_nodes and context\_map\_size are important parameters. context\_map\_size = 4 gives the best result.

Table 14: CART hyperparameters space

| Parameters        | Set of values searched on |
|-------------------|---------------------------|
| criterion         | gini, entropy             |
| splitter          | best, random              |
| max_depth         | 1 to 10                   |
| min_samples_split | 1 to 10                   |
| min_samples_leaf  | 1, 2, 4, 5                |
| max_features      | sqrt, log2                |

Table 15: Random Forest hyperparameters space

| Parameters        | Set of values searched on |
|-------------------|---------------------------|
| criterion         | gini, entropy             |
| n_estimators      | 10, 20, 50, 100           |
| max_depth         | 1 to 10                   |
| min_samples_split | 1 to 10                   |
| min_samples_leaf  | 1, 2, 4, 5                |
| max_features      | sqrt, log2                |

Table 16: SDT hyperparameters space

| Parameters        | Set of values searched on                   |
|-------------------|---------------------------------------------|
| depth             | 1 to 10                                     |
| lamda             | 0.1, 0.01, 0.02, 0.05, 0.001                |
| learning rate(lr) | 0.1, 0.01, 0.02, 0.05, 0.001, 0.005, 0.0001 |
| epochs            | 200, 300, 500                               |
| batches           | 32, 64, 128                                 |
| weight decay      | 0, 0.1, 0.0005                              |

Table 17: TAO hyperparameters space

| Parameters          | Set of values searched on    |
|---------------------|------------------------------|
| n_iters             | 10, 20, 30                   |
| max_leaf_nodes      | 5, 10, 15                    |
| randomize_tree      | True, False                  |
| update_scoring      | accuracy                     |
| min_node_samples_ao | 1, 2, 3, 4, 5                |
| min_leaf_samples_ao | 1, 2, 3, 4, 5                |
| reg_param           | 0.1, 0.01, 0.02, 0.05, 0.001 |

Table 18: Zan-DT hyperparameters space

| Parameters | Set of values searched on    |
|------------|------------------------------|
| depth      | 1 to 10                      |
| reg        | 0.1, 0.01, 1.48, 1.5, 2      |
| mlp_layer  | 3, 4, 5                      |
| dropout    | 0.0, 0.01, 0.05, 0.07, 0.1   |
| lr         | 0.1, 0.01, 0.02, 0.05, 0.001 |
| epochs     | 200, 300, 500                |
| batches    | 32, 64, 128, 512             |



Table 19: Disnn hyperparameters space

| Parameters       | Set of values searched on |
|------------------|---------------------------|
| n_polytopes_list | 1 - 15,20,30,100          |
| m_list           | 1 - 15,20,30,100          |

Table 20: GLN hyperparameters space

| Parameters       | Set of values searched on            |
|------------------|--------------------------------------|
| layer_sizes      | 3,4,5                                |
| num_nodes        | 5,10,20,50                           |
| context_map_size | 2 to 10                              |
| lr               | 0.1, 0.01, 0.02, 0.05, 0.001,0.00025 |
